# Supplementary material for: Ternary pentagonal BXN (X = C, Si, Ge, and Sn) sheets with high piezoelectricity
Source: Royal Society of Chemistry journal article supplement (doi:10.1039/d2ra08342f), 2023-01-01
Supplement: d2ra08342f1.pdf [file d2ra08342f1.pdf]

## Supplementary information for

# “Ternary Pentagonal BXN (X = C, Si, Ge and Sn) Sheets with High Piezoelectricity”

Thanasee Thanasarnsurapong,<sup>†</sup> Panyalak Detrattanawichai,<sup>†</sup> Klichchupong Dabsamut,<sup>†</sup> Intuon Chatratin,<sup>‡</sup> Jiraroj T-Thienprasert,<sup>†</sup> Sirichok Jungthawan,<sup>¶</sup> and Adisak Boonchun<sup>\*,†</sup>

<sup>†</sup>Department of Physics, Faculty of Science, Kasetsart University, Bangkok 10900, Thailand

<sup>‡</sup>Department of Materials Science and Engineering, University of Delaware, Newark, DE, 19716, USA

<sup>¶</sup>School of Physics, Institute of Science, and Center of Excellence in Advanced Functional Materials, Suranaree University of Technology, Muang, Nakhon Ratchasima, 30000, Thailand

\*E-mail: Adisak.bo@ku.th

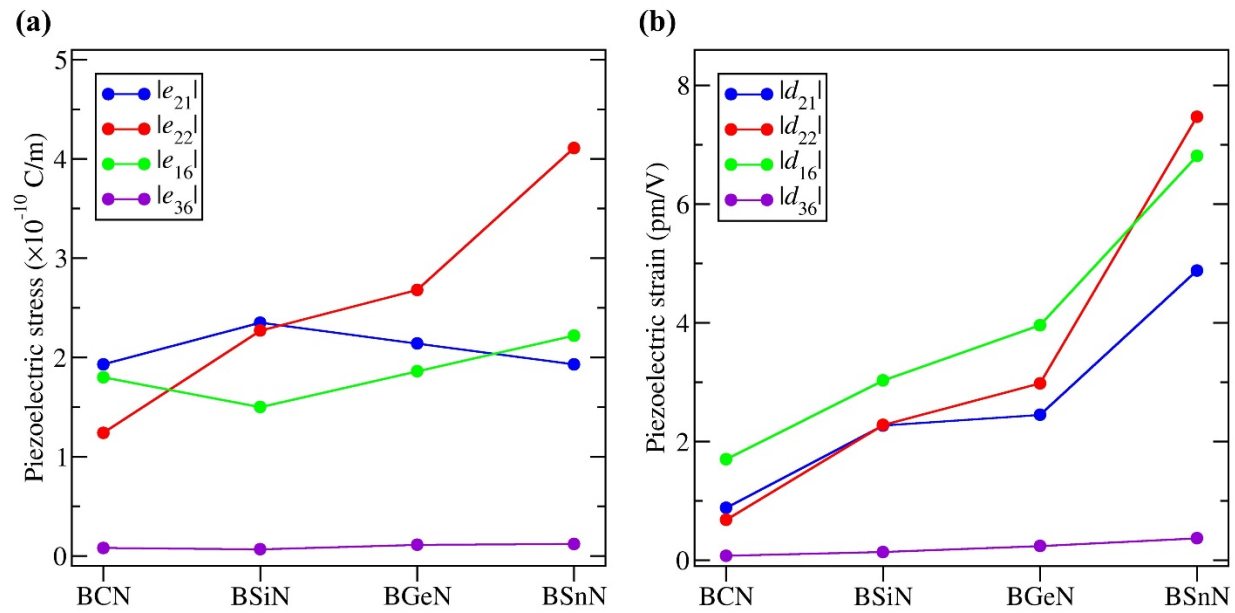

**FIG S1** The (a) piezoelectric stress tensors and (b) piezoelectric strain tensors of *penta*-BXN (X=C, Si, Ge and Sn)

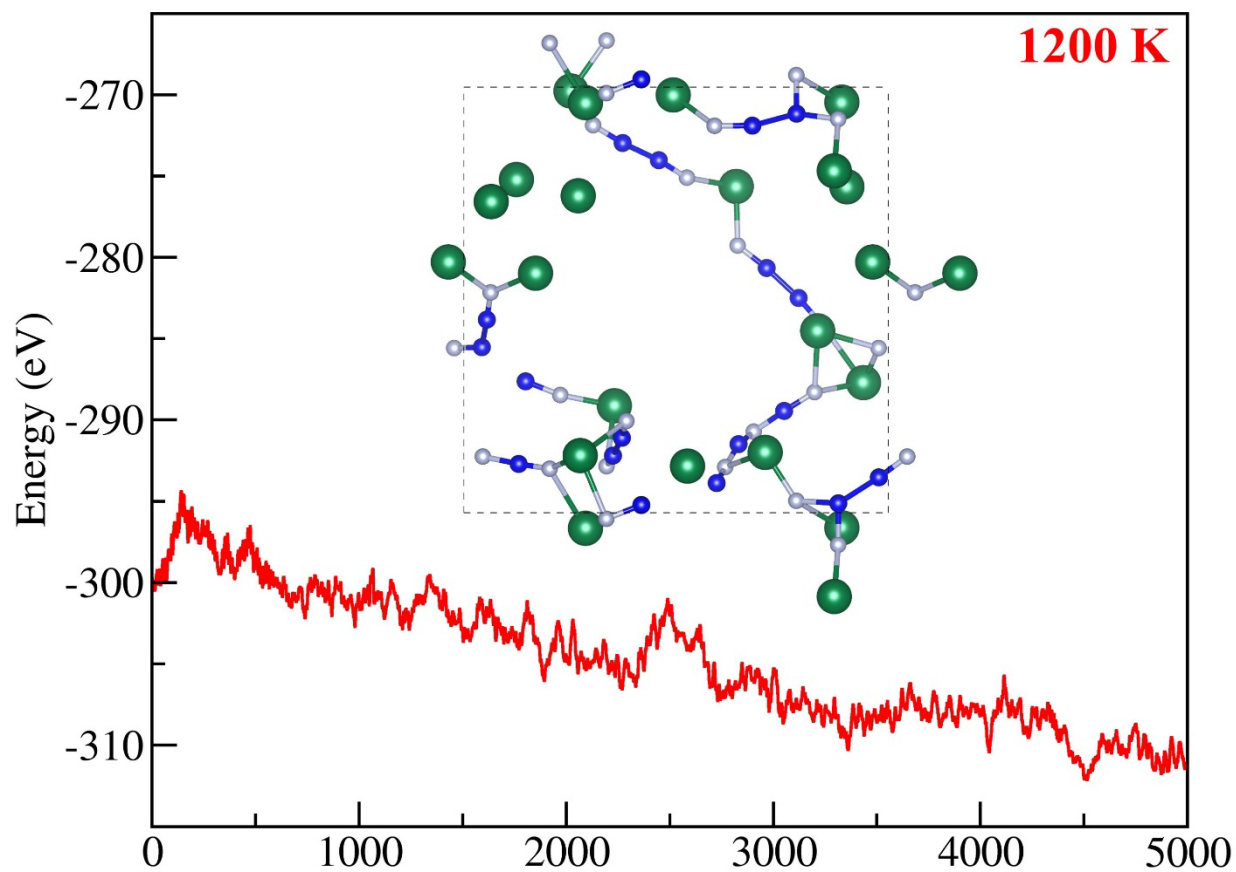

FIG S2 MD simulation of *penta*-BSnN at temperature of 1200 K

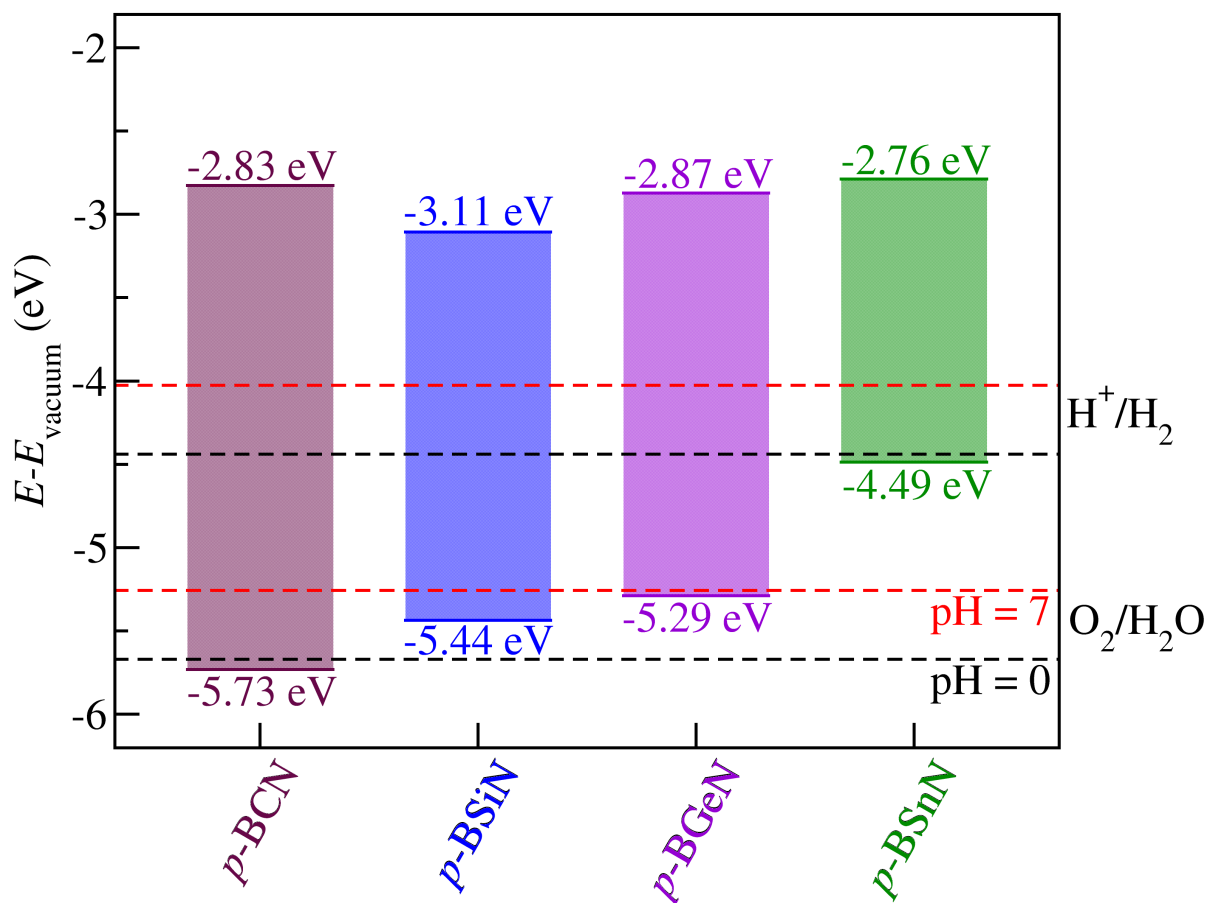

**FIG S3** Band edge alignment of the ternary *penta*-BXN with relation to the redox potentials for water-splitting at  $\text{pH} = 0$  (black dash line) and  $\text{pH} = 7$  (red dash line).
